# Supplementary material for: Socioeconomic position over the life course and impaired lung function of older adults in Central and Eastern Europe: the HAPIEE study
Source: PubMed Central journal article supplement (PMC9763222; doi:10.1136/jech-2022-219348), 2022-11-02

Supplementary Figure 1

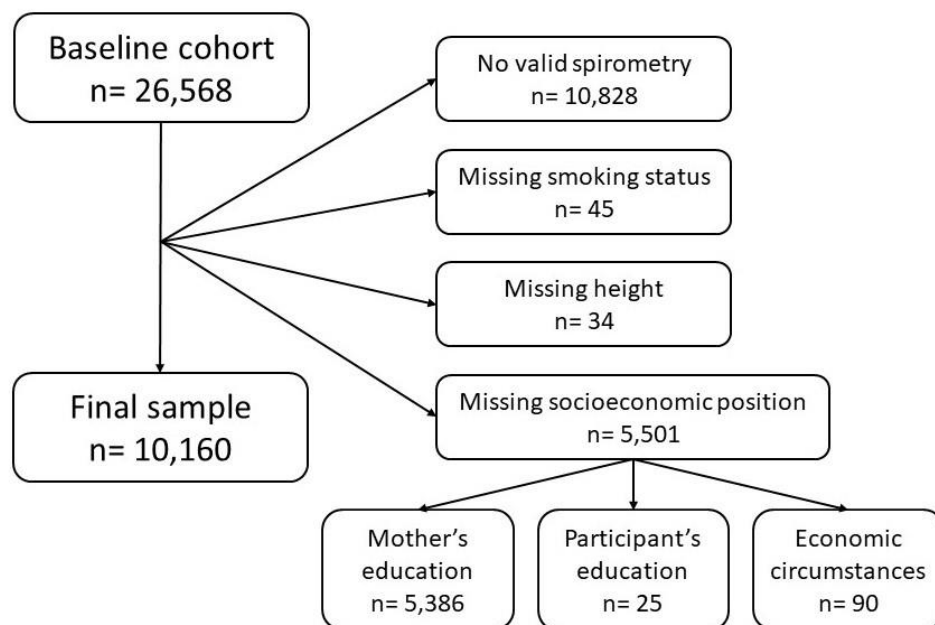

Supplement: jech-2022-219348supp001.pdf [file jech-2022-219348supp001.pdf]
