# Supplementary material for: Socioeconomic position over the life course and impaired lung function of older adults in Central and Eastern Europe: the HAPIEE study
Source: PubMed Central journal article supplement (PMC9763222; doi:10.1136/jech-2022-219348), 2022-11-02
Supplement: jech-2022-219348supp002.pdf [file jech-2022-219348supp002.pdf]

Supplementary Figure 2

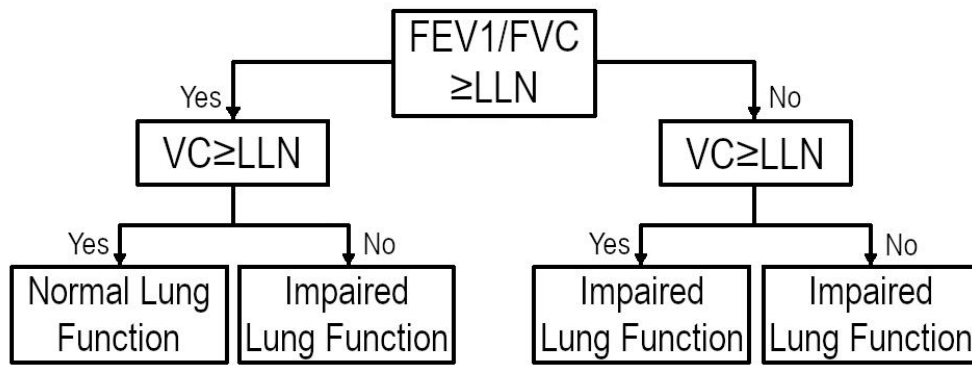

*FEV1/FVC* Forced expiratory volume divided by forced vital capacity

*VC* Vital capacity

*LLN* Lower limit of normality
