# Supplementary material for: Socioeconomic position over the life course and impaired lung function of older adults in Central and Eastern Europe: the HAPIEE study
Source: PubMed Central journal article supplement (PMC9763222; doi:10.1136/jech-2022-219348), 2022-11-02
Supplement: jech-2022-219348supp003.pdf [file jech-2022-219348supp003.pdf]

**Supplementary Table 1.** Odds ratio (95% CI) for impaired lung function by SEP indicators adjusted for age and sex.

| Model type                                         | SEP category                         | Level<br>0=Adv<br>1=Disadv    | Czech Republic<br>n= 3,620 | Poland<br>n= 3,871 | Lithuania<br>n= 2,669 |
|----------------------------------------------------|--------------------------------------|-------------------------------|----------------------------|--------------------|-----------------------|
| <b>MODEL 1</b><br><b>Critical period</b>           | Childhood                            | 0                             | 1.0                        | 1.0                | 1.0                   |
|                                                    |                                      | 1                             | 1.06 (0.88–1.27)           | 1.09 (0.92–1.28)   | 1.11 (0.83–1.49)      |
|                                                    | Young Adulthood                      | 0                             | 1.0                        | 1.0                | 1.0                   |
|                                                    |                                      | 1                             | 1.33 (1.02–1.72)           | 1.38 (1.15–1.65)   | 1.45 (1.13–1.85)      |
|                                                    | Late Adulthood                       | 0                             | 1.0                        | 1.0                | 1.0                   |
|                                                    |                                      | 1                             | 1.09 (0.92–1.30)           | 1.19 (1.02–1.39)   | 1.53 (1.19–1.98)      |
| <b>MODEL 2</b><br><b>Sensitive period</b>          | Childhood                            | 0                             | 1.0                        | 1.0                | 1.0                   |
|                                                    |                                      | 1                             | 1.03 (0.85–1.23)           | 1.00 (0.84–1.19)   | 1.02 (0.76–1.38)      |
|                                                    | Young Adulthood                      | 0                             | 1.0                        | 1.0                | 1.0                   |
|                                                    |                                      | 1                             | 1.31 (1.00–1.70)           | 1.35 (1.12–1.63)   | 1.42 (1.10–1.82)      |
|                                                    | Late Adulthood                       | 0                             | 1.0                        | 1.0                | 1.0                   |
|                                                    |                                      | 1                             | 1.07 (0.90–1.28)           | 1.16 (0.99–1.35)   | 1.51 (1.17–1.94)      |
| <b>MODEL 3</b><br><b>Trajectories</b>              | Trajectory across three-time points  | 0, 0, 0                       | 1.0                        | 1.0                | 1.0                   |
|                                                    |                                      | 0, 0, 1                       | 1.11 (0.60–2.06)           | 1.15 (0.76–1.73)   | 1.49 (0.82–2.70)      |
|                                                    |                                      | 0, 1, 0                       | 1.44 (0.94–2.21)           | 1.27 (0.88–1.85)   | 0.78 (0.36–1.70)      |
|                                                    |                                      | 0, 1, 1                       | 1.31 (0.85–2.01)           | 1.49 (1.04–2.12)   | 2.07 (0.98–4.36)      |
|                                                    |                                      | 1, 0, 0                       | 1.24 (0.67–2.29)           | 0.88 (0.59–1.32)   | 0.99 (0.63–1.58)      |
|                                                    |                                      | 1, 0, 1                       | 0.76 (0.32–1.81)           | 1.17 (0.72–1.92)   | 1.02 (0.59–1.76)      |
|                                                    |                                      | 1, 1, 0                       | 1.25 (1.83–1.90)           | 1.33 (0.98–1.81)   | 1.27 (0.81–1.99)      |
|                                                    |                                      | 1, 1, 1                       | 1.56 (1.04–2.35)           | 1.51 (1.11–2.04)   | 2.25 (1.41–3.60)      |
| <b>Model 4</b><br><b>Social mobility</b>           | Always up                            | 0, 0, 0                       | 1.0                        | 1.0                | 1.0                   |
|                                                    |                                      | 1, 0, 0<br>1, 0, 1<br>1, 1, 0 | 1.22 (0.81–1.83)           | 1.22 (0.91–1.64)   | 1.11 (0.74–1.67)      |
|                                                    |                                      | 0, 0, 1<br>0, 1, 0<br>0, 1, 1 | 1.35 (0.90–2.01)           | 1.32 (0.97–1.80)   | 1.32 (0.81–2.17)      |
|                                                    |                                      | 1, 1, 1                       | 1.56 (1.03–2.35)           | 1.51 (1.11–2.04)   | 2.25 (1.41–3.59)      |
| <b>MODEL 5</b><br><b>Disadvantage accumulation</b> | No. times disadvantaged, categorical | 0                             | 1.0                        | 1.0                | 1.0                   |
|                                                    |                                      | 1                             | 1.36 (0.90–2.06)           | 1.10 (0.80–1.51)   | 1.05 (0.68–1.62)      |
|                                                    |                                      | 2                             | 1.25 (0.84–1.86)           | 1.36 (1.01–1.82)   | 1.26 (0.82–1.92)      |
|                                                    |                                      | 3                             | 1.56 (1.03–2.35)           | 1.51 (1.11–2.05)   | 2.28 (1.43–3.64)      |

SEP Socioeconomic position; Adv Advantaged SEP; Disadv Disadvantaged SEP
